# Supplementary material for: Rice (Oryza sativa L.) Grain Size, Shape, and Weight-Related QTLs Identified Using GWAS with Multiple GAPIT Models and High-Density SNP Chip DNA Markers
Source: MDPI journal article supplement (doi:10.3390/plants12234044), 2023-11-30
Supplement: s1 [file s1]

# Rice (*Oryza sativa* L.) Grain Size, Shape, and Weight-Related QTLs Identified Using GWAS with Multiple GAPIT Models and High-Density SNP Chip DNA Markers

Nkulu Rolly Kabange <sup>1,\*</sup>, Gamenyah Daniel Dzorkpe <sup>2</sup>, Dong-Soo Park <sup>1</sup>, Youngho Kwon <sup>1</sup>, Sais-Beul Lee <sup>1</sup>, So-Myeong Lee <sup>1</sup>, Ju-Won Kang <sup>1</sup>, Seong-Gyu Jang <sup>1</sup>, Ki-Won Oh <sup>1</sup> and Jong-Hee Lee <sup>1,\*</sup>

<sup>1</sup> Department of Southern Area Crop Science, National Institute of Crop Science, Rural Development Administration (RDA), Miryang 50424, Republic of Korea; parkds9709@korea.kr (D.-S.P.); kwon6344@korea.kr (Y.K.); pappler@korea.kr (S.-B.L.); olivetti90@korea.kr (S.-M.L.); kangjw81@korea.kr (J.-W.K.); sgjang0136@korea.kr (S.-G.J.); ohkw1004@korea.kr (K.-W.O.)

<sup>2</sup> Council for Scientific and Industrial Research (CSIR), Crops Research Institute, Kumasi 3785, Ghana; gamenyahdaniel@gmail.com

\* Correspondence: rollykabange@korea.kr (N.R.K.); ccrljh@korea.kr (J.-H.L.); Tel.: +82-10-5413-4881 (N.R.K.); +82-53-350-1169 (J.-H.L.); Fax: +82-55-352-3059 (J.-H.L.)

**Table S1.** Normality test of grain traits (GL, GW, GT, LWR, and TGW)

| Observations                                                        | Grain traits |       |        |       |       |
|---------------------------------------------------------------------|--------------|-------|--------|-------|-------|
|                                                                     | GL           | GW    | GT     | LWR   | TGW   |
| Mean                                                                | 60.1         | 36.5  | 2.01   | 1.77  | 21.1  |
| Std. Deviation                                                      | 2.36         | 1.66  | 0.0664 | 0.123 | 1.29  |
| Std. Error of Mean                                                  | 0.192        | 0.135 | 0.0054 | 0.01  | 0.105 |
| Sum                                                                 | 9077         | 5509  | 303    | 267   | 3189  |
| Skewness                                                            | 1.48         | -1.15 | -1.26  | 4.21  | -0.41 |
| Kurtosis                                                            | 7.15         | 5.48  | 7.48   | 33.7  | 1.28  |
| D'Agostino & Pearson normality test                                 |              |       |        |       |       |
| K2 (95.4% of data falls within two standard deviations of the mean) | 65.7         | 49.7  | 59.6   | 174   | 10    |
| P value                                                             | <.001        | <.001 | <.001  | <.001 | 0.007 |
| Passed normality test (alpha=0.05)?                                 | No           | No    | No     | No    | No    |
| P value summary                                                     | ***          | ***   | ***    | ***   | **    |
| Shapiro-Wilk normality test                                         |              |       |        |       |       |
| W                                                                   | 0.885        | 0.916 | 0.909  | 0.722 | 0.976 |
| P value                                                             | <.001        | <.001 | <.001  | <.001 | 0.009 |
| Passed normality test (alpha=0.05)?                                 | No           | No    | No     | No    | No    |
| P value summary                                                     | ***          | ***   | ***    | ***   | **    |

GL: grain length, GW: grain width, GT, grain thickness, LWR: grain length-to-width ratio, and TGW: thousand grain weight, \*\*\* $p < 0.001$ , \*\* $p < 0.01$ .

**Table S2.** Linked Markers to grain length, width, thickness, LWR, and thousand-grain weight.

| Trait/QTL                     | SNP Chip Marker | Chr | Position (bp) | <i>P-value</i> | MAF  | nobs | Effect | PVE (%) | Allele |
|-------------------------------|-----------------|-----|---------------|----------------|------|------|--------|---------|--------|
| GL                            | BLINK           |     |               |                |      |      |        |         |        |
| <i>qGL1-1<sup>BFSG</sup></i>  | AX-95918134     | 1   | 3820526       | 4.27E-15       | 0.02 | 143  | -3.54  | 72.5    | TTWH1  |
| <i>qGL11-1<sup>BFSG</sup></i> | AX-274862201    | 11  | 16356105      | 8.58E-24       | 0.06 | 143  | 2.35   | 31.9    | Ilpum  |
| <i>qGL2-1<sup>BFSG</sup></i>  | AX-115751685    | 2   | 35100558      | 1.62E-10       | 0.34 | 143  | -0.66  | 22.9    | TTWH1  |
| <i>qGL3-1<sup>BF</sup></i>    | AX-154437636    | 3   | 2253428       | 1.72E-09       | 0.20 | 143  | 0.86   | 5.5     | Ilpum  |
| <i>qGL2-2<sup>BF</sup></i>    | AX-154880023    | 2   | 35133528      | 2.88E-07       | 0.29 | 143  | -0.70  | 3.1     | TTWH1  |
| <i>qGL7-1<sup>BFSG</sup></i>  | AX-153903748    | 7   | 6690089       | 4.09E-12       | 0.44 | 143  | -0.79  | 2.6     | TTWH1  |
| <i>qGL1-2<sup>BF</sup></i>    | AX-279584700    | 1   | 41489588      | 6.18E-09       | 0.13 | 143  | -1.29  | 1.7     | TTWH1  |
| <i>qGL5<sup>BFSG</sup></i>    | AX-282746698    | 5   | 16169537      | 2.05E-09       | 0.19 | 143  | 0.72   | 1.4     | Ilpum  |
|                               | FarmCPU         |     |               |                |      |      |        |         |        |
| <i>qGL1-1<sup>BFSG</sup></i>  | AX-95918134     | 1   | 3820526       | 2.49E-17       | 0.02 | 143  | -3.72  | 65.5    | TTWH1  |
| <i>qGL11-1<sup>BFSG</sup></i> | AX-274862201    | 11  | 16356105      | 6.86E-23       | 0.06 | 143  | 2.26   | 34.5    | Ilpum  |
| <i>qGL11-2<sup>FSG</sup></i>  | AX-115751092    | 11  | 2823622       | 3.79E-07       | 0.08 | 143  | 0.93   | 14.0    | Ilpum  |
| <i>qGL3-2<sup>Farm</sup></i>  | AX-154551783    | 3   | 8242439       | 5.58E-08       | 0.17 | 143  | -1.42  | 8.0     | TTWH1  |
| <i>qGL7-1<sup>BFSG</sup></i>  | AX-153903748    | 7   | 6690089       | 2.67E-09       | 0.44 | 143  | -0.73  | 7.6     | TTWH1  |
| <i>qGL2-1<sup>BFSG</sup></i>  | AX-115751685    | 2   | 35100558      | 1.36E-07       | 0.34 | 143  | -0.56  | 5.1     | TTWH1  |
| <i>qGL5-1<sup>BFSG</sup></i>  | AX-282746698    | 5   | 16169537      | 1.27E-08       | 0.19 | 143  | 0.67   | 4.3     | Ilpum  |
| <i>qGL3-1<sup>BF</sup></i>    | AX-154437636    | 3   | 2253428       | 3.00E-09       | 0.20 | 143  | 0.76   | 3.8     | Ilpum  |
| <i>qGL2-2<sup>BF</sup></i>    | AX-154880023    | 2   | 35133528      | 1.23E-06       | 0.29 | 143  | -0.64  | 3.2     | TTWH1  |
| <i>qGL1-2<sup>BF</sup></i>    | AX-279584700    | 1   | 41489588      | 2.95E-08       | 0.13 | 143  | -1.13  | 1.3     | TTWH1  |
|                               | SUPER           |     |               |                |      |      |        |         |        |
| <i>qGL1-1<sup>BFSG</sup></i>  | AX-95918134     | 1   | 3820526       | 4.27E-15       | 0.02 | 143  | -3.54  | 72.5    | TTWH1  |
| <i>qGL11-1<sup>BFSG</sup></i> | AX-274862201    | 11  | 16356105      | 6.86E-23       | 0.06 | 143  | 2.26   | 34.5    | Ilpum  |
| <i>qGL11-2<sup>FSG</sup></i>  | AX-115751092    | 11  | 2823622       | 3.79E-07       | 0.08 | 143  | 0.93   | 14.0    | Ilpum  |
| <i>qGL7-1<sup>BFSG</sup></i>  | AX-153903748    | 7   | 6690089       | 2.67E-09       | 0.44 | 143  | -0.73  | 7.6     | TTWH1  |
| <i>qGL2-1<sup>BFSG</sup></i>  | AX-115751685    | 2   | 35100558      | 1.36E-07       | 0.34 | 143  | -0.56  | 5.1     | TTWH1  |
| <i>qGL5-1<sup>BFSG</sup></i>  | AX-282746698    | 5   | 16169537      | 1.27E-08       | 0.18 | 143  | 0.67   | 4.3     | Ilpum  |
|                               | GLM             |     |               |                |      |      |        |         |        |
| <i>qGL1-1<sup>BFSG</sup></i>  | AX-95918134     | 1   | 3820526       | 4.27E-15       | 0.02 | 143  | -3.54  | 72.5    | TTWH1  |
| <i>qGL11-1<sup>BFSG</sup></i> | AX-274862201    | 11  | 16356105      | 6.86E-23       | 0.06 | 143  | 2.26   | 34.5    | Ilpum  |
| <i>qGL11-2<sup>FSG</sup></i>  | AX-115751092    | 11  | 2823622       | 3.79E-07       | 0.08 | 143  | 0.93   | 14.0    | Ilpum  |
| <i>qGL7-1<sup>BFSG</sup></i>  | AX-153903748    | 7   | 6690089       | 2.67E-09       | 0.44 | 143  | -0.73  | 7.6     | TTWH1  |
| <i>qGL2-1<sup>BFSG</sup></i>  | AX-115751685    | 2   | 35100558      | 1.36E-07       | 0.34 | 143  | -0.56  | 5.1     | TTWH1  |
| <i>qGL5-1<sup>BFSG</sup></i>  | AX-282746698    | 5   | 16169537      | 1.27E-08       | 0.18 | 143  | 0.67   | 4.3     | Ilpum  |
| GW                            | BLINK           |     |               |                |      |      |        |         |        |
| <i>qGW1-1<sup>BFSG</sup></i>  | AX-273945773    | 1   | 5623288       | 8.36E-13       | 0.32 | 143  | 0.63   | 18.9    | Ilpum  |
| <i>qGW2-1<sup>Blink</sup></i> | AX-279699609    | 2   | 10805604      | 8.17E-18       | 0.10 | 143  | -1.16  | 14.9    | TTWH1  |
| <i>qGW1-3<sup>BF</sup></i>    | AX-115791785    | 1   | 43103625      | 9.44E-28       | 0.30 | 143  | -1.01  | 8.8     | TTWH1  |
| <i>qGW1-4<sup>Blink</sup></i> | AX-281116133    | 1   | 20864932      | 1.52E-11       | 0.17 | 143  | 0.56   | 6.9     | Ilpum  |
| <i>qGW6-1<sup>BF</sup></i>    | AX-115737727    | 6   | 28484619      | 5.27E-07       | 0.15 | 143  | 0.42   | 6.2     | Ilpum  |
| <i>qGW3-1<sup>Blink</sup></i> | AX-154073979    | 3   | 7895651       | 9.65E-08       | 0.33 | 143  | 0.46   | 4.8     | Ilpum  |
| <i>qGW3-2<sup>Blink</sup></i> | AX-115811160    | 3   | 14888685      | 6.12E-15       | 0.21 | 143  | 0.65   | 4.1     | Ilpum  |
|                               | FarmCPU         |     |               |                |      |      |        |         |        |

|                   |              |    |          |          |      |     |       |      |       |
|-------------------|--------------|----|----------|----------|------|-----|-------|------|-------|
| $qGW1-1^{BFSG}$   | AX-273945773 | 1  | 5623288  | 3.39E-09 | 0.32 | 143 | 0.57  | 15.5 | Ilpum |
| $qGW6-2^{FSG}$    | AX-273990782 | 6  | 13986482 | 2.45E-07 | 0.12 | 143 | -0.44 | 14.9 | TTWH1 |
| $qGW1-6^{Farm}$   | AX-280898927 | 1  | 2483022  | 2.66E-08 | 0.06 | 143 | -0.66 | 9.4  | TTWH1 |
| $qGW1-3^{BF}$     | AX-115791785 | 1  | 43103625 | 5.18E-10 | 0.30 | 143 | -0.44 | 8.7  | TTWH1 |
| $qGW6-1^{BF}$     | AX-115737727 | 6  | 28484619 | 5.27E-07 | 0.15 | 143 | 0.48  | 5.4  | Ilpum |
| $qGW12-1^{FSG}$   | AX-284265976 | 12 | 13013702 | 6.88E-08 | 0.10 | 143 | -0.39 | 4.2  | TTWH1 |
| $qGW8-1^{FSG}$    | AX-115796459 | 8  | 3875546  | 2.89E-08 | 0.21 | 143 | 0.40  | 3.7  | Ilpum |
| $qGW2-3^{Farm}$   | AX-279994820 | 2  | 35461009 | 2.02E-06 | 0.15 | 143 | -0.68 | 3.5  | TTWH1 |
| $qGW2-4^{Farm}$   | AX-154042022 | 2  | 24704256 | 1.30E-09 | 0.27 | 143 | 0.54  | 3.4  | Ilpum |
| $qGW3-3^{Farm}$   | AX-154797543 | 3  | 2973374  | 4.00E-07 | 0.31 | 143 | 0.39  | 1.2  | Ilpum |
| SUPER             |              |    |          |          |      |     |       |      |       |
| $qGW1-1^{BFSG}$   | AX-273945773 | 1  | 5623288  | 3.39E-09 | 0.32 | 143 | 0.57  | 15.5 | Ilpum |
| $qGW6-2^{FSG}$    | AX-273990782 | 6  | 13986482 | 2.45E-07 | 0.12 | 143 | -0.44 | 14.9 | TTWH1 |
| $qGW12-1^{FSG}$   | AX-284265976 | 12 | 13013702 | 6.88E-08 | 0.09 | 143 | -0.39 | 4.2  | TTWH1 |
| $qGW8-1^{FSG}$    | AX-115796459 | 8  | 3875546  | 2.89E-08 | 0.21 | 143 | 0.40  | 3.7  | Ilpum |
| GLM               |              |    |          |          |      |     |       |      |       |
| $qGW1-1^{BFSG}$   | AX-273945773 | 1  | 5623288  | 3.39E-09 | 0.32 | 143 | 0.57  | 15.5 | Ilpum |
| $qGW6-2^{FSG}$    | AX-273990782 | 6  | 13986482 | 2.45E-07 | 0.12 | 143 | -0.44 | 14.9 | TTWH1 |
| $qGW12-1^{FSG}$   | AX-284265976 | 12 | 13013702 | 6.88E-08 | 0.09 | 143 | -0.39 | 4.2  | TTWH1 |
| $qGW8-1^{FSG}$    | AX-115796459 | 8  | 3875546  | 2.89E-08 | 0.21 | 143 | 0.40  | 3.7  | Ilpum |
| GT                | BLINK        |    |          |          |      |     |       |      |       |
| $qGT1^{Blink}$    | AX-279261704 | 1  | 18023142 | 3.10E-07 | 0.02 | 143 | -0.07 | 74.9 | TTWH1 |
| FarmCPU           |              |    |          |          |      |     |       |      |       |
| $qGT2-1^{Farm}$   | AX-154787777 | 2  | 2118477  | 3.09E-11 | 0.03 | 143 | -0.13 | 54.9 | TTWH1 |
| $qGT2-2^{Farm}$   | AX-154913392 | 2  | 25105471 | 7.77E-09 | 0.29 | 143 | 0.03  | 5.3  | Ilpum |
| LWR               | BLINK        |    |          |          |      |     |       |      |       |
| $qLWR10^{Blink}$  | AX-115835839 | 10 | 22038978 | 5.11E-07 | 0.17 | 143 | 0.03  | 26.5 | Ilpum |
| $qLWR2-1^{BFSG}$  | AX-274833045 | 2  | 10000097 | 1.24E-07 | 0.06 | 143 | -0.09 | 15.2 | TTWH1 |
| $qLWR1-1^{BF}$    | AX-154960834 | 1  | 1595394  | 1.51E-12 | 0.41 | 143 | -0.04 | 13.5 | TTWH1 |
| $qLWR1-2^{Blink}$ | AX-115737888 | 1  | 600441   | 6.38E-09 | 0.15 | 143 | -0.06 | 10.7 | TTWH1 |
| $qLWR3^{Blink}$   | AX-154834762 | 3  | 8098398  | 6.51E-10 | 0.17 | 143 | -0.08 | 6.9  | TTWH1 |
| FarmCPU           |              |    |          |          |      |     |       |      |       |
| $qLWR2-1^{BFSG}$  | AX-274833045 | 2  | 10000097 | 1.38E-08 | 0.06 | 143 | -0.11 | 32.9 | TTWH1 |
| $qLWR6-1^{FSG}$   | AX-115851421 | 6  | 10178858 | 1.54E-16 | 0.08 | 143 | 0.07  | 30.5 | Ilpum |
| $qLWR1-1^{BF}$    | AX-154960834 | 1  | 1595394  | 9.97E-11 | 0.41 | 143 | -0.04 | 13.2 | TTWH1 |
| $qLWR6-2^{FSG}$   | AX-155522120 | 6  | 30842264 | 1.26E-06 | 0.15 | 143 | -0.05 | 9.4  | TTWH1 |
| $qLWR8^{FSG}$     | AX-154176130 | 8  | 5398451  | 4.47E-07 | 0.15 | 143 | -0.04 | 5.9  | TTWH1 |
| SUPER             |              |    |          |          |      |     |       |      |       |
| $qLWR2-1^{BFSG}$  | AX-274833045 | 2  | 10000097 | 1.24E-07 | 0.06 | 143 | -0.09 | 15.2 | TTWH1 |
| $qLWR6-1^{FSG}$   | AX-115851421 | 6  | 10178858 | 1.54E-16 | 0.08 | 143 | 0.07  | 30.5 | Ilpum |
| $qLWR6-2^{FSG}$   | AX-155522120 | 6  | 30842264 | 1.26E-06 | 0.15 | 143 | -0.05 | 9.4  | TTWH1 |
| $qLWR8^{FSG}$     | AX-154176130 | 8  | 5398451  | 4.47E-07 | 0.15 | 143 | -0.04 | 5.9  | TTWH1 |
| GLM               |              |    |          |          |      |     |       |      |       |
| $qLWR2-1^{BFSG}$  | AX-274833045 | 2  | 10000097 | 1.24E-07 | 0.06 | 143 | -0.09 | 15.2 | TTWH1 |
| $qLWR6-1^{FSG}$   | AX-115851421 | 6  | 10178858 | 1.54E-16 | 0.08 | 143 | 0.07  | 30.5 | Ilpum |
| $qLWR6-2^{FSG}$   | AX-155522120 | 6  | 30842264 | 1.26E-06 | 0.15 | 143 | -0.05 | 9.3  | TTWH1 |

|                                |              |   |          |          |      |     |       |      |       |
|--------------------------------|--------------|---|----------|----------|------|-----|-------|------|-------|
| <i>qLWR8<sup>FSG</sup></i>     | AX-154176130 | 8 | 5398451  | 4.47E-07 | 0.15 | 143 | -0.04 | 5.9  | TTWH1 |
| TGW                            | BLINK        |   |          |          |      |     |       |      |       |
| <i>qTGW6<sup>BFSG</sup></i>    | AX-115737727 | 6 | 28484619 | 3.60E-10 | 0.15 | 143 | 0.88  | 32.8 | Ilpum |
| <i>qTGW2-1<sup>BF</sup></i>    | AX-279699609 | 2 | 10805604 | 4.19E-21 | 0.10 | 143 | -1.33 | 18.6 | TTWH1 |
| <i>qTGW1-1<sup>Blink</sup></i> | AX-154298059 | 1 | 5644298  | 2.56E-06 | 0.30 | 143 | 0.37  | 11.6 | Ilpum |
| <i>qTGW3-1<sup>BF</sup></i>    | AX-154471576 | 3 | 15332432 | 1.08E-10 | 0.06 | 143 | -0.93 | 10.7 | TTWH1 |
| <i>qTGW2-2<sup>BF</sup></i>    | AX-154096541 | 2 | 10773042 | 1.05E-11 | 0.17 | 143 | 0.83  | 7.8  | Ilpum |
| <i>qTGW1-2<sup>BFSG</sup></i>  | AX-154333920 | 1 | 5860250  | 1.95E-10 | 0.30 | 143 | 0.40  | 4.9  | Ilpum |
| <i>qTGW1-3<sup>BF</sup></i>    | AX-154810092 | 1 | 42931550 | 2.15E-17 | 0.26 | 143 | -0.62 | 4.03 | TTWH1 |
|                                | FarmCPU      |   |          |          |      |     |       |      |       |
| <i>qTGW6<sup>BFSG</sup></i>    | AX-115737727 | 6 | 28484619 | 9.95E-08 | 0.15 | 143 | 0.71  | 54.0 | Ilpum |
| <i>qTGW2-1<sup>BF</sup></i>    | AX-279699609 | 2 | 10805604 | 5.49E-15 | 0.10 | 143 | -0.98 | 27.9 | TTWH1 |
| <i>qTGW3-2<sup>Farm</sup></i>  | AX-123153600 | 3 | 7887961  | 2.47E-19 | 0.33 | 143 | 0.84  | 13.9 | Ilpum |
| <i>qTGW1-3<sup>BF</sup></i>    | AX-154810092 | 1 | 42931550 | 4.87E-17 | 0.26 | 143 | -0.58 | 8.3  | TTWH1 |
| <i>qTGW2-2<sup>BF</sup></i>    | AX-154096541 | 2 | 10773042 | 3.38E-10 | 0.17 | 143 | 0.72  | 7.5  | Ilpum |
| <i>qTGW3-1<sup>BF</sup></i>    | AX-154471576 | 3 | 15332432 | 4.98E-09 | 0.06 | 143 | -0.79 | 7.2  | TTWH1 |
| <i>qTGW1-2<sup>BFSG</sup></i>  | AX-154333920 | 1 | 5860250  | 1.41E-11 | 0.30 | 143 | 0.57  | 6.2  | Ilpum |
|                                | SUPER        |   |          |          |      |     |       |      |       |
| <i>qTGW6<sup>BFSG</sup></i>    | AX-115737727 | 6 | 28484619 | 9.95E-08 | 0.15 | 143 | 0.71  | 54.0 | Ilpum |
| <i>qTGW1-2<sup>BFSG</sup></i>  | AX-154333920 | 1 | 5860250  | 1.41E-11 | 0.30 | 143 | 0.57  | 6.2  | Ilpum |
|                                | GLM          |   |          |          |      |     |       |      |       |
| <i>qTGW6<sup>BFSG</sup></i>    | AX-115737727 | 6 | 28484619 | 9.95E-08 | 0.15 | 143 | 0.71  | 54.0 | Ilpum |
| <i>qTGW1-2<sup>BFSG</sup></i>  | AX-154333920 | 1 | 5860250  | 1.41E-11 | 0.30 | 143 | 0.57  | 6.2  | Ilpum |

GL: grain length, GW: grain width, GT: grain thickness, LWR: Length-to-width ratio, and TGW: thousand-grain weight. Chr: chromosome, MAF: minor allelic frequency, nobs: number of observations, PVE: phenotype variance explained. *qTrait<sup>Blink</sup>*: QTL detected by BLINK only, *qTrait<sup>Farm</sup>*: QTL detected by FarmCPU only, GLM, *qTrait<sup>Glm</sup>*: QTL detected by GLM only, *qTrait<sup>FSG</sup>*: QTL co-detected by FarmCPU, SUPER, and GLM, *qTrait<sup>BFSG</sup>*: QTL co-detected by BLINK, FarmCPU, SUPER, and GLM.

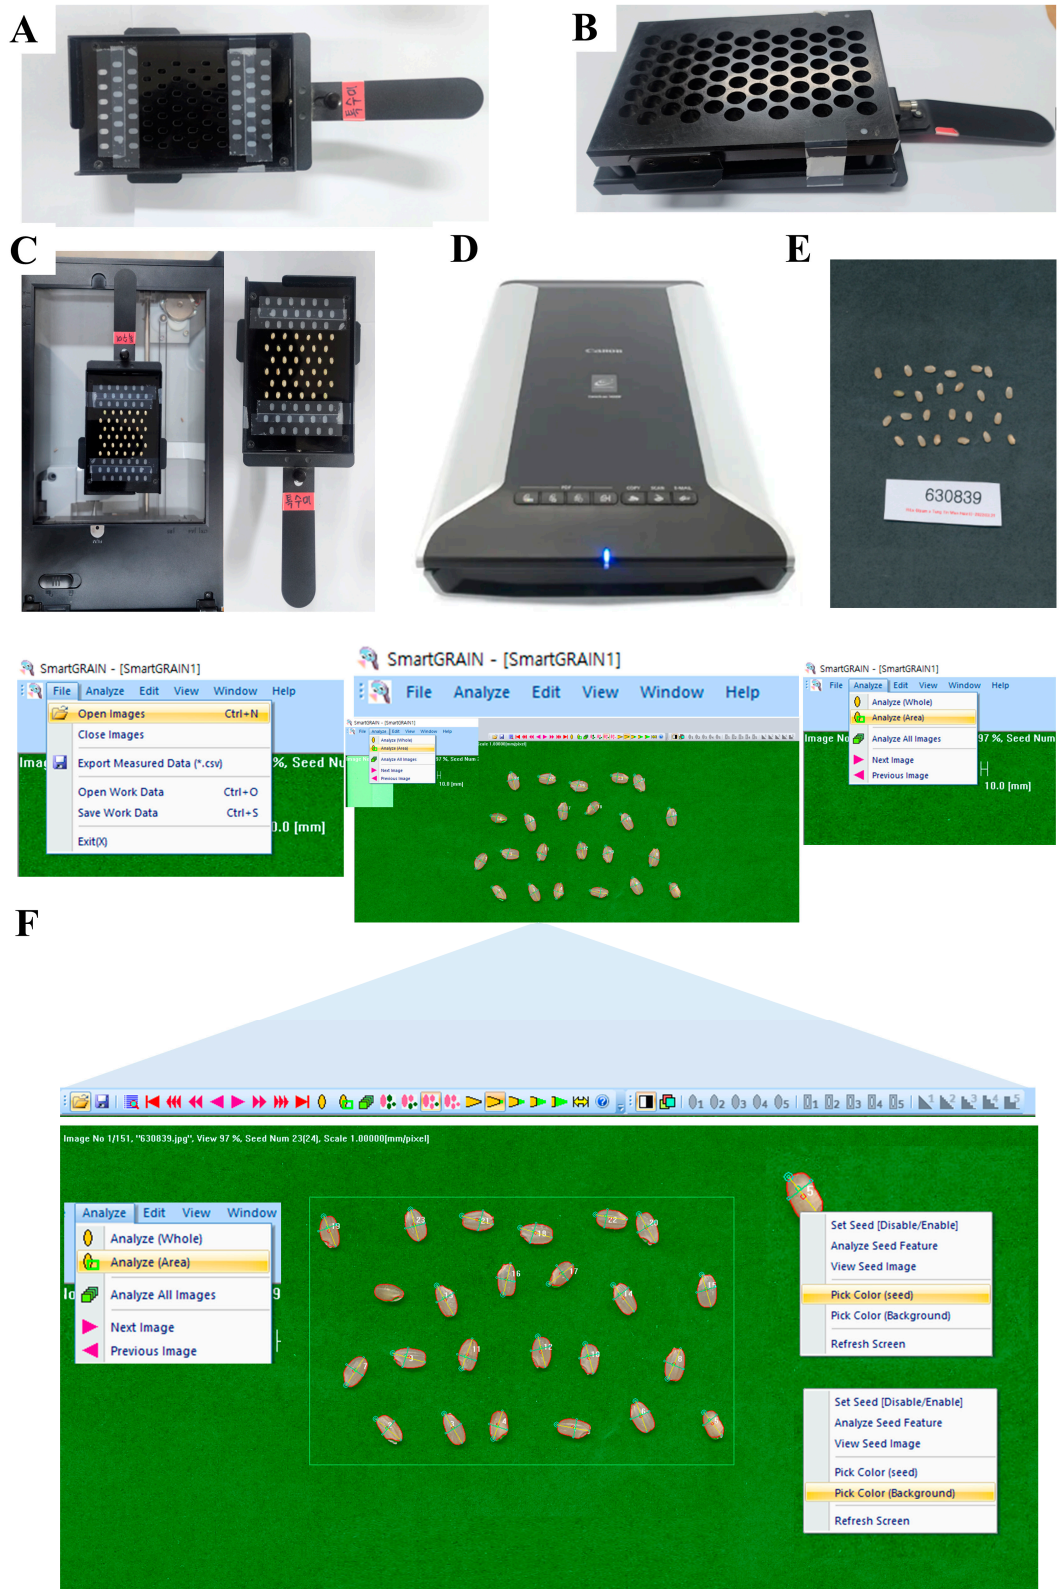

**Figure S1.** Illustration of rice grain length, width, and length-to-width ratio analysis using SMART GRAIN software. (A,B) Images of a rice grain dispenser, (C) A rice dispenser with rice grain on a scanner, (D,E) Scanner and scanned rice grains with a label, and (F) visualization of stepwise grain shape analysis.
